# Supplementary material for: Direct exfoliation of graphite using a non-ionic polymer surfactant for fabrication of transparent and conductive graphene films
Source: Royal Society of Chemistry journal article supplement (doi:10.1039/c2tc00586g), 2013-01-01
Supplement: c2tc00586g.pdf [file c2tc00586g.pdf]

## Electronic Supplementary Information

# Direct exfoliation of graphite using non-ionic polymer surfactant for fabrication of transparent and conductive graphene film

Min Soo Kang,<sup>a</sup> Kyung Tae Kim,<sup>a</sup> Jea Uk Lee<sup>b</sup> and Won Ho Jo<sup>\*a</sup>

<sup>a</sup>Department of Materials Science and Engineering, Seoul National University 1 Gwanak-ro, Gwanak-gu, Seoul 151-744, Korea  
E-mail: [whpoly@snu.ac.kr](mailto:whpoly@snu.ac.kr)

<sup>b</sup>Composite Materials Research Group, Korea Institute of Materials Science, Changwon, Gyeongnam, 642-831, Korea  
E-mail: [leejeuk0373@hanmail.net](mailto:leejeuk0373@hanmail.net)

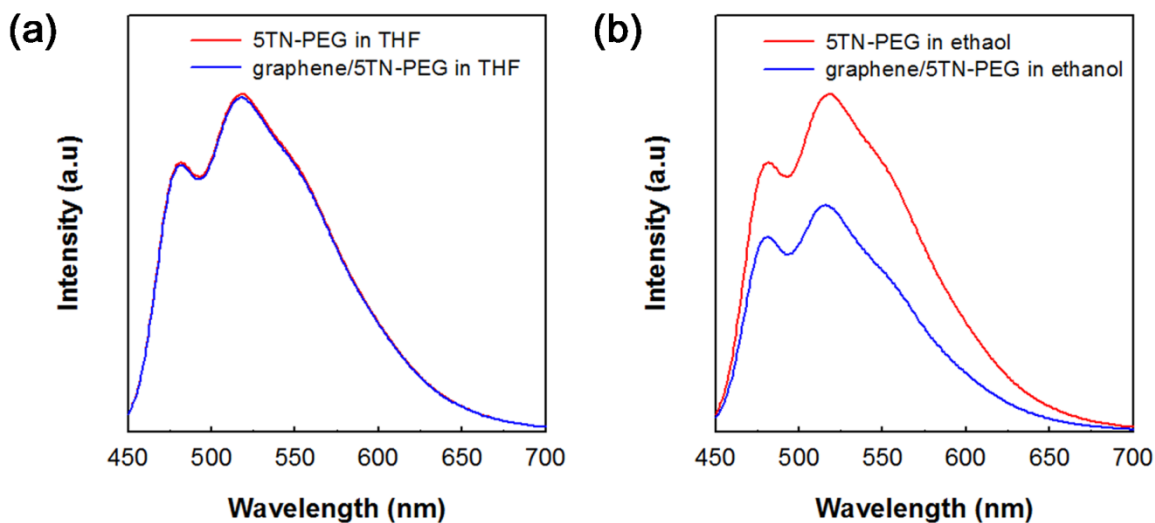

**Fig. S1** Photoluminescence spectra of (a) 5TN-PEG and graphene/5TN-PEG in THF; (b) 5TN-PEG and graphene/5TN-PEG in ethanol.

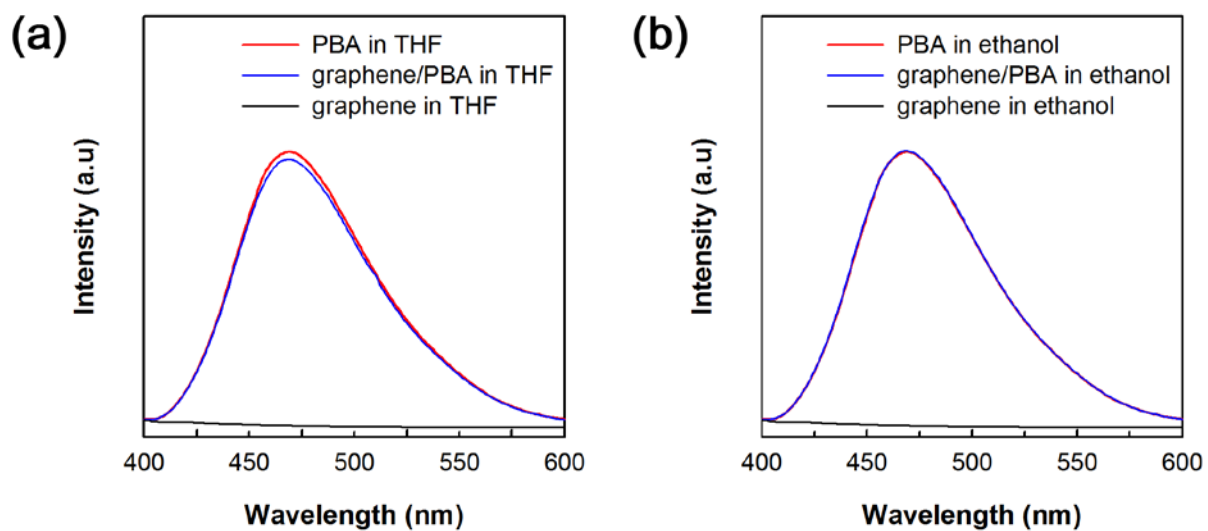

**Fig. S2** Photoluminescence spectra of (a) PBA, graphene/PBA and graphene in THF; (b) PBA, graphene/PBA and graphene in ethanol.

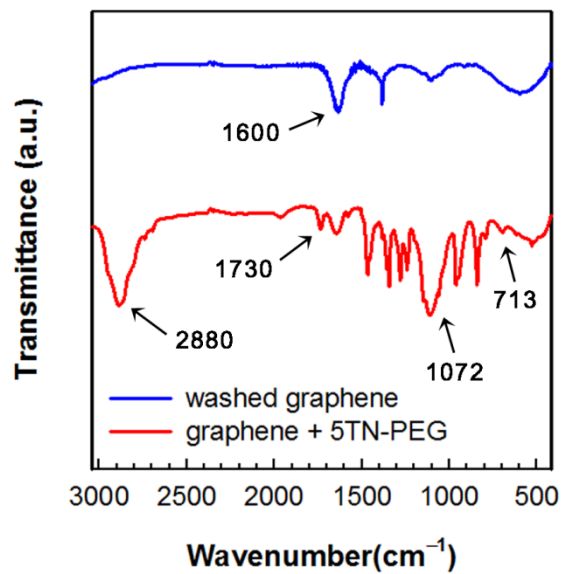

**Fig. S3** Comparison of FT-IR spectra of washed graphene with that of graphene + 5TN-PEG.

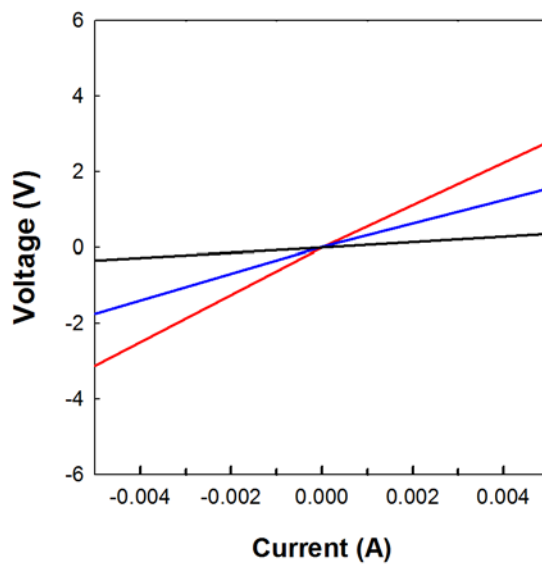

**Fig. S4** I-V curves of graphene films

| Color | Transmittance at 550 nm (%) | Resistance ( $\Omega$ ) | Sheet resistance ( $\Omega \text{ sq}^{-1}$ ) |
|-------|-----------------------------|-------------------------|-----------------------------------------------|
| Red   | 96                          | 613.825                 | 2200                                          |
| Black | 82                          | 380.254                 | 1200                                          |
| Blue  | 74                          | 67.328                  | 300                                           |

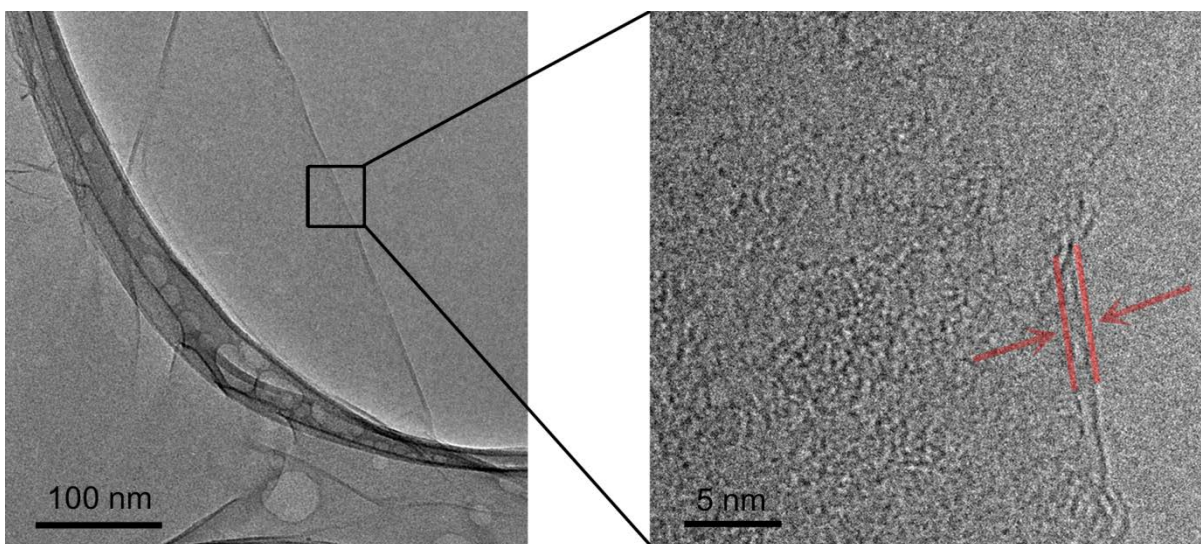

**Fig. S5** HRTEM image of graphene film edge.

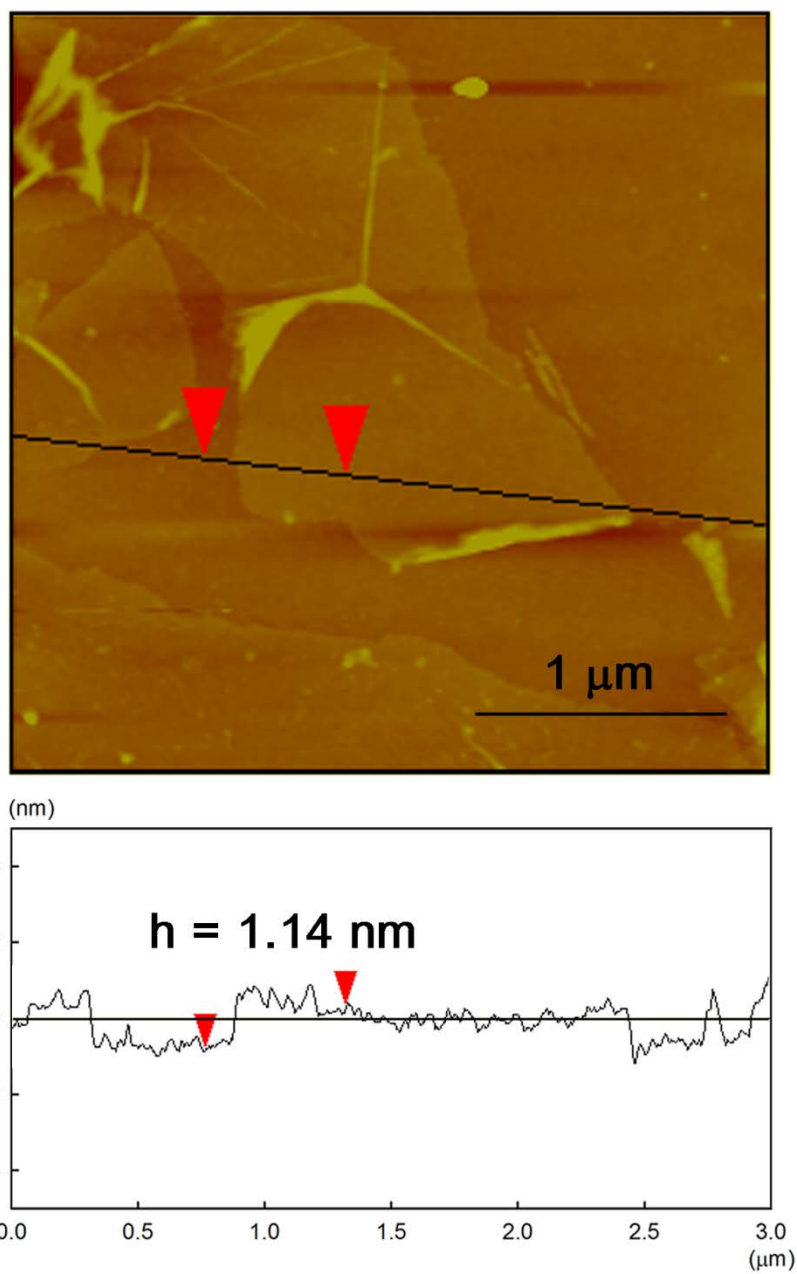

**Fig. S6** Layer analysis by AFM.
